# Supplementary material for: Down- and up-conversion photoluminescence, cathodoluminescence and paramagnetic properties of NaGdF4 : Yb3+,Er3+ submicron disks assembled from primary nanocrystals
Source: Royal Society of Chemistry journal article supplement (doi:10.1039/b924448d), 2010-01-01
Supplement: b924448d.pdf [file b924448d.pdf]

Electronic Supplementary Information (ESI)

**Down-/ up-conversion photoluminescence,  
cathodoluminescence and paramagnetic properties of NaGdF<sub>4</sub>:  
Yb<sup>3+</sup>, Er<sup>3+</sup> submicron disks assembled from primary  
nanocrystals**

Zhen-Ling Wang, J. H. Hao\* and Helen L. W. Chan

*Department of Applied Physics and Materials Research Centre, The Hong Kong  
Polytechnic University, Hung Hom, Kowloon, Hong Kong, P.R. China*

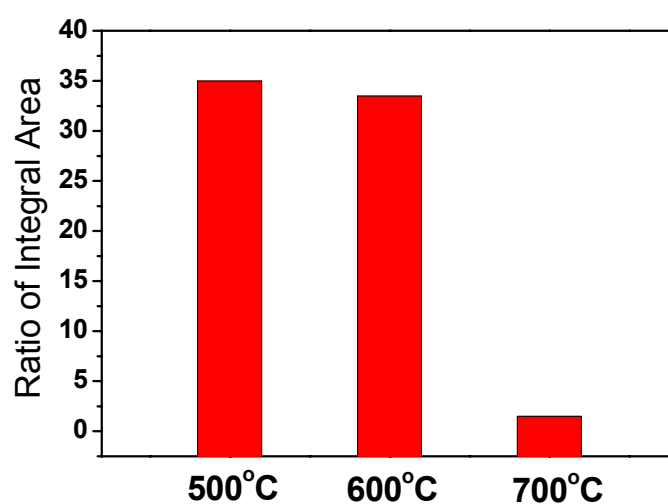

Fig. S1 The integral area ratio of red emission (630-710 nm) to green emission (510-570 nm) for NaGdF<sub>4</sub>: Yb<sup>3+</sup>, Er<sup>3+</sup> submicron disks annealed at different temperatures.

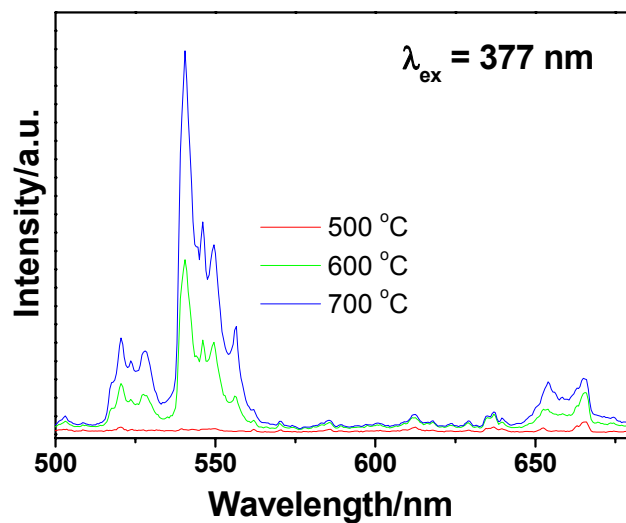

Fig. S2 Down-conversion PL spectra of NaGdF<sub>4</sub>: Yb<sup>3+</sup>, Er<sup>3+</sup> submicron disks annealed at different temperatures.
